# Supplementary material
Source: PubMed Central journal article supplement (PMC4170732)
Supplement: NIHMS616386-supplement-01.pdf [file NIHMS616386-supplement-01.pdf]

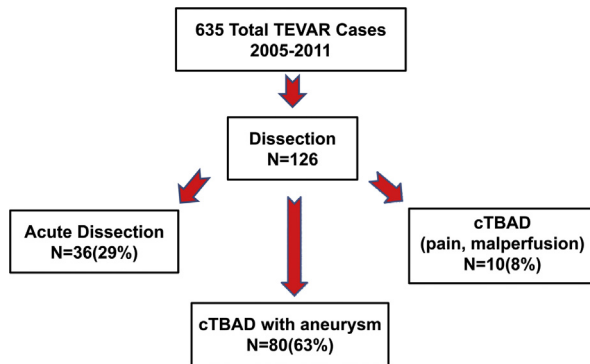

**Supplementary Fig (online only).** Study selection criteria algorithm. *cTBAD*, Chronic type B aortic dissection; *TEVAR*, thoracic endovascular aortic aneurysm repair.
